# Supplementary material
Source: publisher figshare collection journal article supplement (https://acs.figshare.com/ndownloader/files/5092912)

Supplementary Material:

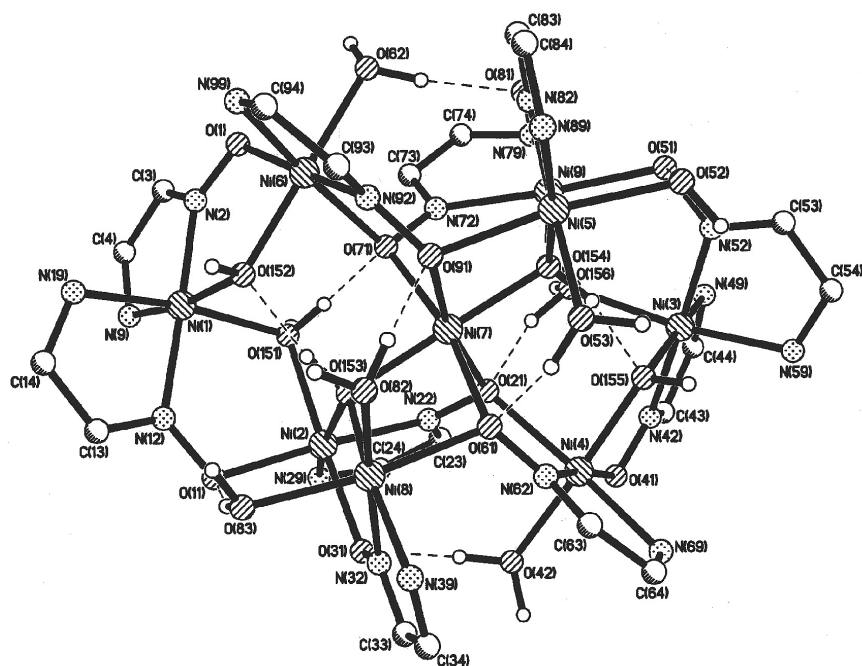

A perspective view of the hydrogen bonding in  $\text{Ni}^{\text{II}}_9$  cluster

Supplement: Supplementary file 1 [file 5092912]
